# Supplementary material for: Inhibition of excessive mitophagy by N-acetyl-L-tryptophan confers hepatoprotection against Ischemia-Reperfusion injury in rats
Source: PeerJ. 2020 Apr 9;8:e8665. doi: 10.7717/peerj.8665 (PMC7151751; doi:10.7717/peerj.8665)
Supplement: Data S2 [file peerj-08-8665-s003.xlsx]

## Sheet: Sheet1
Fig.1
PCR	Sham	IR01h	IR4h	IR6h	IR12h	IR24h
	1	1.01166	1.03207	1.16424	1.03596	1.01652
	1	1.11652	1.08323	1.16261	1.06274	1.04609
	1	1.04834	1.11326	1.29006	1.04696	1.04972
WB	Sham	0h	1h	4h	6h	12h	24h
	1	1.66539	2.26796	2.37573	3.3873	1.94278	1.79661
	1	1.44724	1.99675	2.93309	3.59861	2.22997	2.63721
	1	1.06794	1.13131	1.76319	2.36876	1.34854	1.14935
Fig.2
PCR
	sham	I/R(6h)	L-NAT		sham	I/R(6h)	L-NAT		sham	I/R(6h)	L-NAT		sham	I/R(6h)	L-NAT
Beclin1	1	2.28153	1.10573	LC3-Ⅱ	1	2.56685	1.70527	ATG-7	1	2.08493	1.22689	P62	1	0.41466	1.17284
	1	1.86607	1.14076		1	3.20428	1.3333		1	2.12138	1.08674		1	0.779165	1.3333
	1	2.07772	1.30134		1	2.48802	1.32869		1	1.90528	1.00347		1	0.771105	1.62451
WB
	sham	I/R(6h)	L-NAT		sham	I/R(6h)	L-NAT		sham	I/R(6h)	L-NAT		sham	I/R(6h)	L-NAT
Beclin1	1	1.51639	1.10096	LC3-Ⅱ	1	1.26827	0.786611	ATG-7	1	1.59457	1.36297	P62	1	0.323029	0.839209
	1	1.63405	1.44314		1	1.07418	0.940192		1	1.26254	1.0397		1	0.328401	0.624852
	1	2.07772	1.30134		1	1.32051	0.843861		1	1.42855	1.20133		1	0.289694	0.803764
		1.35379	0.883891
Fig.3
PCR
	Control	H2O2	L-NAT		Control	H2O2	L-NAT		Control	H2O2	L-NAT		Control	H2O2	L-NAT
Beclin1	1	1.12829	1.03838	LC3-Ⅱ	1	1.15326	1.11836	ATG-7	1	1.15167	1.03282	P62	1	0.84371	0.963834
	1	1.25673	0.823991		1	1.13636	1.05824		1	1.28279	0.966796		1	0.385033	1.22126
	1	1.17714	0.940571		1	1.25266	1.16895		1	1.17617	0.897233		1	0.445361	1.06598
WB
	Control	H2O2	L-NAT		Control	H2O2	L-NAT		Control	H2O2	L-NAT		Control	H2O2	L-NAT
Beclin1	1	2.38275	1.61584	LC3-Ⅱ	1	2.09488	1.76615	ATG-7	1	1.43237	1.15362	P62	1	0.367911	1.22843
	1	1.70873	1.22374		1	2.25939	0.984474		1	2.0021	1.94547		1	0.654285	0.956617
	1	1.79306	1.47508		1	2.43825	1.40453		1	1.76514	1.39388		1	0.511098	1.09253
Fig.6
ATP	Control	H2O2	L-NAT
	1	0.398704	1.028
	1	0.33742	0.729846
	1	0.307566	0.744984
	sham	I/R(6h)	L-NAT
mAtp6/Rp113	1	1.75213	0.877677
	1	1.4259	1.01697
	1	1.17344	0.85405
	sham	I/R(6h)	L-NAT
ND1	1	0.569365	0.713959
	1	0.726044	0.948134
	1	0.695426	0.858776
	sham	I/R(6h)	L-NAT
COX-1	1	0.557822	1.21444
	1	0.748729	0.965838
	1	0.857074	1.12393
Fig.8
cck8	Cont	H2O2	H2O2+LNAT	H2O2+LNAT+3-ma(1mM)	H2O2+LNAT+3-ma(5mM)	H2O2+LNAT+3-ma(10mM)
	1	0.673393	0.782338	0.788255	0.844436	0.711395
	1	0.559967	0.674784	0.856408	0.88708	0.73855
	1	0.656897	0.751724	0.762344	0.820584	0.736439
PCR	Cont	H2O2	H2O2+L-NAT	H2O2+L-NAT+RAPA
	1	1.38623	1.10165	1.20925
	1	1.52147	0.9451	1.27968
	1	1.20674	0.96107	1.32354
WB	Cont	H2O2	H2O2+L-NAT	H2O2+L-NAT+RAPA
	1	1.38623	1.10165	1.20925
	1	1.52147	0.9451	1.27968
	1	1.20674	0.96107	1.32354
